# Supplementary material for: Estrogen-related receptor γ causes osteoarthritis by upregulating extracellular matrix-degrading enzymes
Source: PubMed Central journal article supplement (PMC5732273; doi:10.1038/s41467-017-01868-8), 2017-12-15
Supplement: 41467_2017_1868_MOESM1_ESM.pdf [file 41467_2017_1868_MOESM1_ESM.pdf]

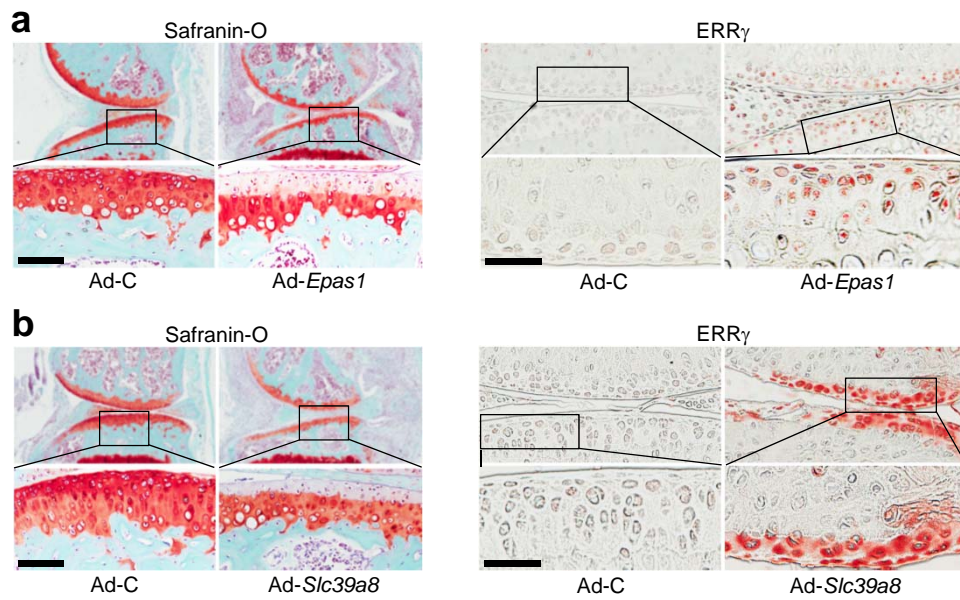

**Supplementary Figure 1.** ERR $\gamma$  is upregulated in chondrocytes of OA cartilage from mouse models. **(a,b)** Safranin-O staining (left) and ERR $\gamma$  immunostaining (right) in OA cartilage from mice subjected to HIF-2 $\alpha$  overexpression via IA injection of Ad-*Epas1* **(a)** or adenovirus-mediated ZIP8 overexpression **(b)** ( $n = 5$  mice per group). IA injection of Ad-C was used as a control.

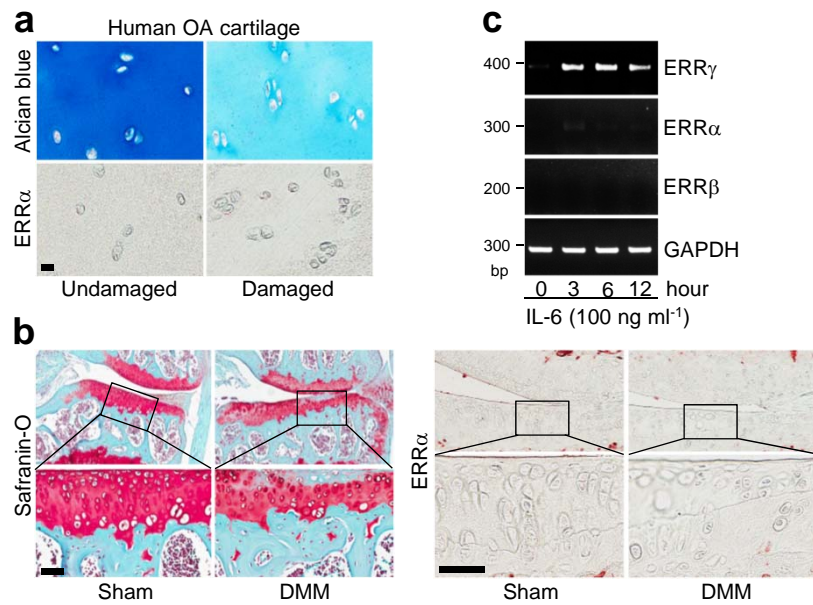

**Supplementary Figure 2.** ERR $\alpha$  is not detected in OA chondrocytes. (a) Representative images of alcian blue staining and ERR $\alpha$  immunostaining in damaged and undamaged regions of human OA cartilage ( $n = 6$ ). (b) Representative images of safranin-O staining and ERR $\alpha$  immunostaining in cartilage sections of sham- and DMM-operated mice ( $n = 6$  mice per group). (c) RT-PCR analysis of ERR isoforms in primary cultured mouse articular chondrocytes treated with IL-6 ( $n = 6$ ). Scale bar: 50  $\mu$ m.

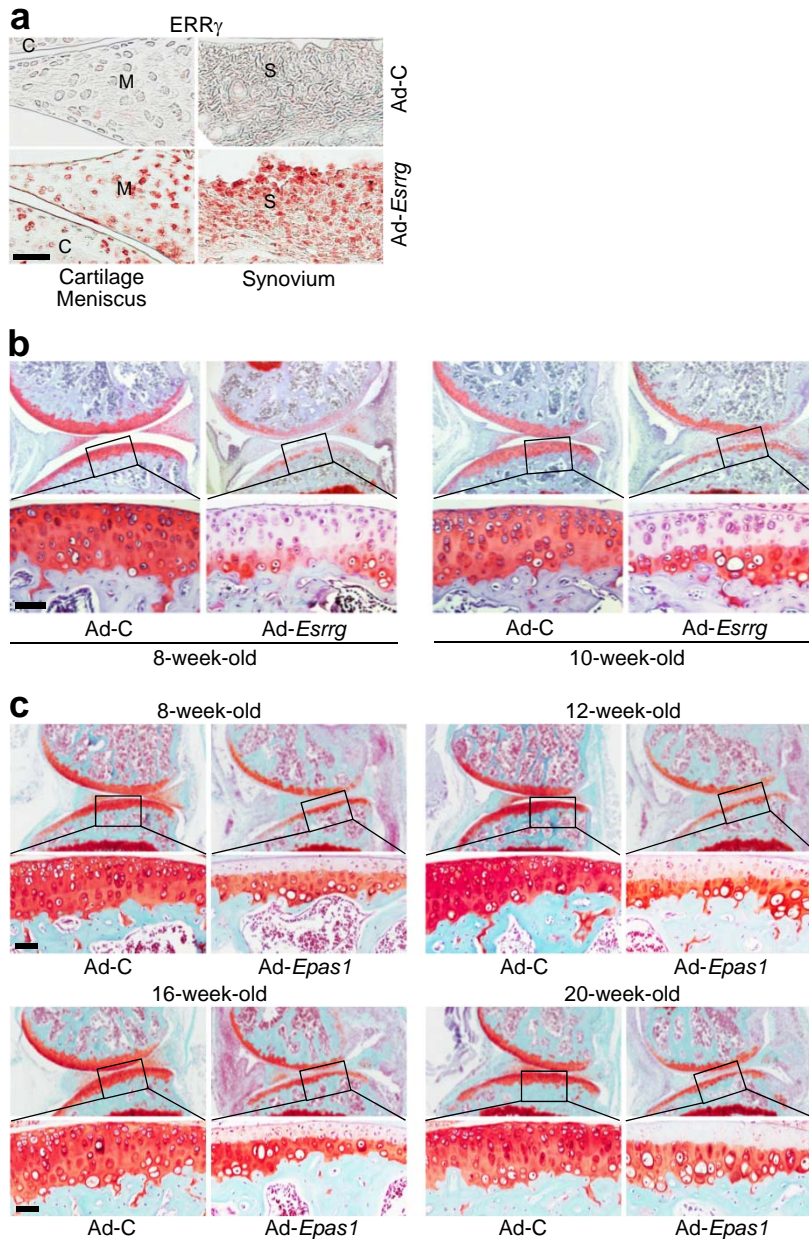

**Supplementary Figure 3.** Characterization of Ad-Esrrog IA injection. **(a)** Immunostaining for ERR $\gamma$  in meniscus and synovial tissues of mice IA-injected with Ad-C (control) or Ad-Esrrog (to overexpress ERR $\gamma$ ) for 3 weeks. C, cartilage; M, meniscus; S, synovium. **(b)** Ad-C and Ad-Esrrog were IA-injected into 8- and 10-week-old mice. Safranin-O staining of joint sections, showing cartilage damage ( $n \geq 8$  mice per group). **(c)** Mice of the indicated age were IA-injected with Ad-C or Ad-Epas1. Cartilage damage was detected by staining sections with safranin-O ( $n = 6$  mice per group). Scale bar: 50  $\mu$ m.

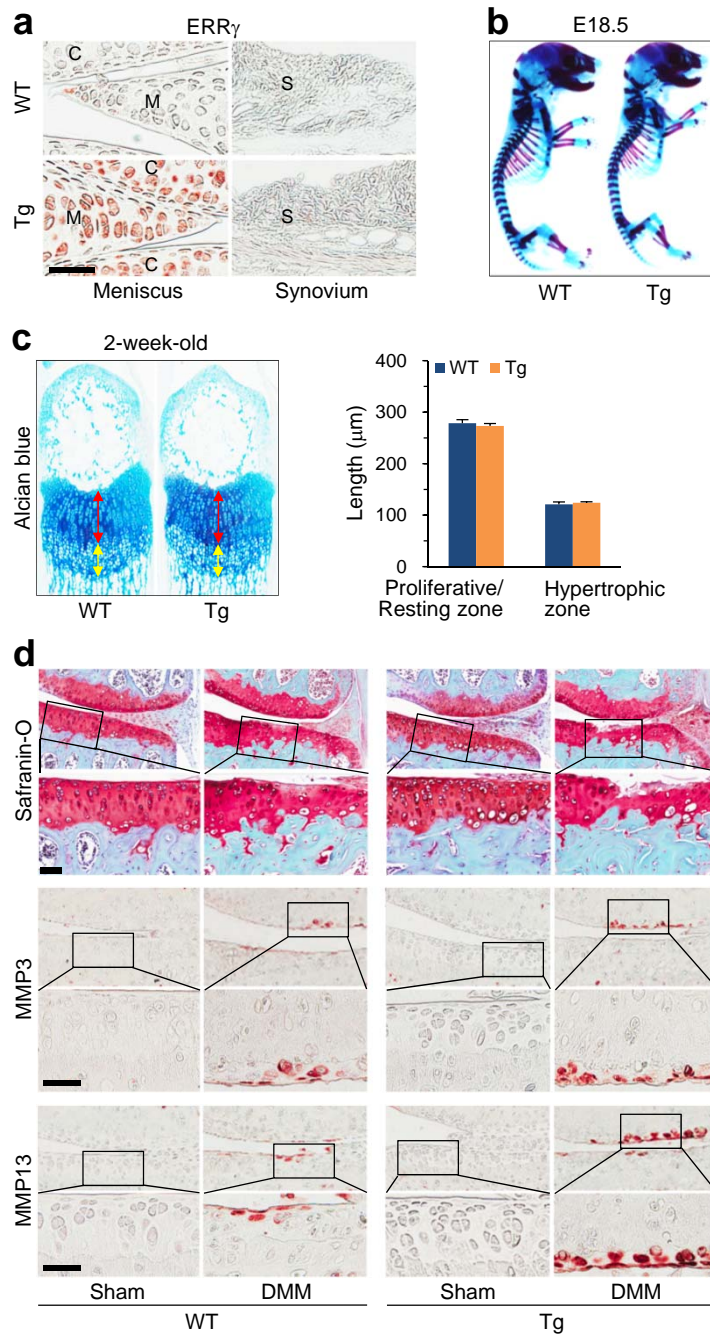

**Supplementary Figure 4.** Characterization of *Col2a1-Esrrg* Tg mice. **(a)** Immunostaining for ERR $\gamma$  in meniscus and synovial sections of 10-week-old WT and Tg mice. C, cartilage; M, meniscus; S, synovium. **(b)** Representative skeletal staining images of E18.5 embryos of *Col2a1-Esrrg* Tg mice and WT littermates. **(c)** Alcian blue staining of 2-week-old metatarsal bones in Tg and WT littermates (left panel). Lengths of resting/proliferative and hypertrophic zones (right panel;  $n \geq 10$  mice per group). **(d)** Tg mice and WT littermates ( $n \geq 8$  mice per group) were subject to sham operation or DMM surgery. Cartilage sections were stained with safranin-O and immunostained for MMP3 and MMP13. Values are presented as means  $\pm$  s.e.m. Scale bar: 50  $\mu\text{m}$ .



**a**

Analysis of DMM surgery studies in recently published 196 papers (2013–2017)

| Category                   | Sub-groups                     | Number of studies |      |
|----------------------------|--------------------------------|-------------------|------|
|                            |                                | No                | %    |
| Age                        | Juvenile (6-7 week)            | 3                 | 1.5  |
|                            | Young adult (8-11 week)        | 141               | 71.9 |
|                            | Mature adult (12-39 week)      | 49                | 25.0 |
|                            | Middle aged (40-71 week)       | 1                 | 0.5  |
|                            | Old (>72 week)                 | 2                 | 1.0  |
| Duration of post-operation | Mild (1-3 week)                | 5                 | 2.6  |
|                            | Mild to moderate (4-7 week)    | 27                | 13.8 |
|                            | Moderate to severe (8-12 week) | 155               | 79.1 |
|                            | Severe (>12 week)              | 9                 | 4.6  |

**b**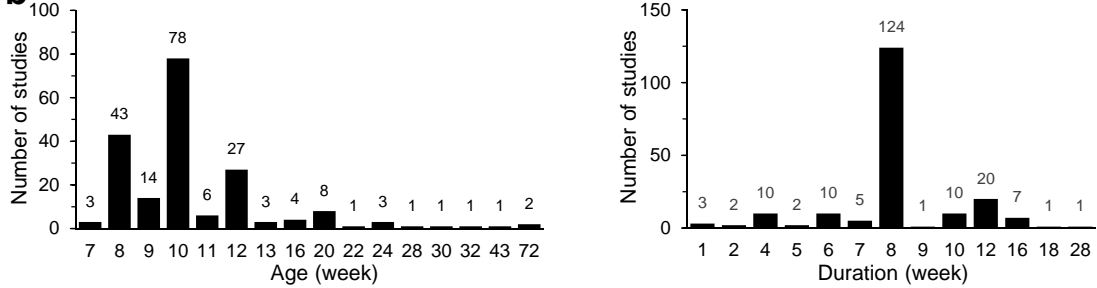**c**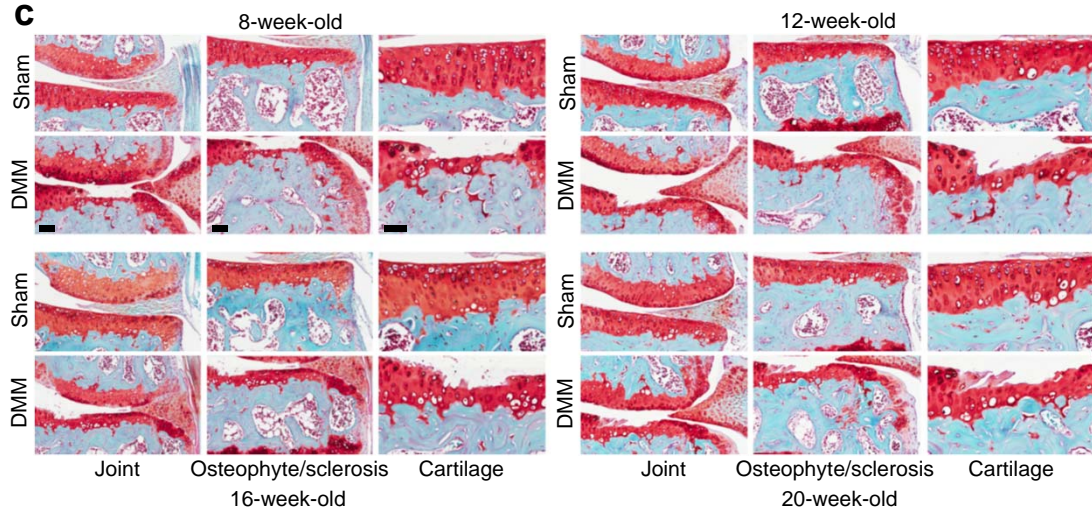

**Supplementary Figure 5.** Characterization of DMM surgery. **(a,b)** Analysis of DMM surgery studies in 196 recently published papers (2013–2017). **(c)** WT mice at the indicated ages were subjected to sham operation or DMM surgery. Representative images of safranin-O staining were obtained at 8 weeks after the operation ( $n = 15$  mice per group). Scale bar: 50 μm.

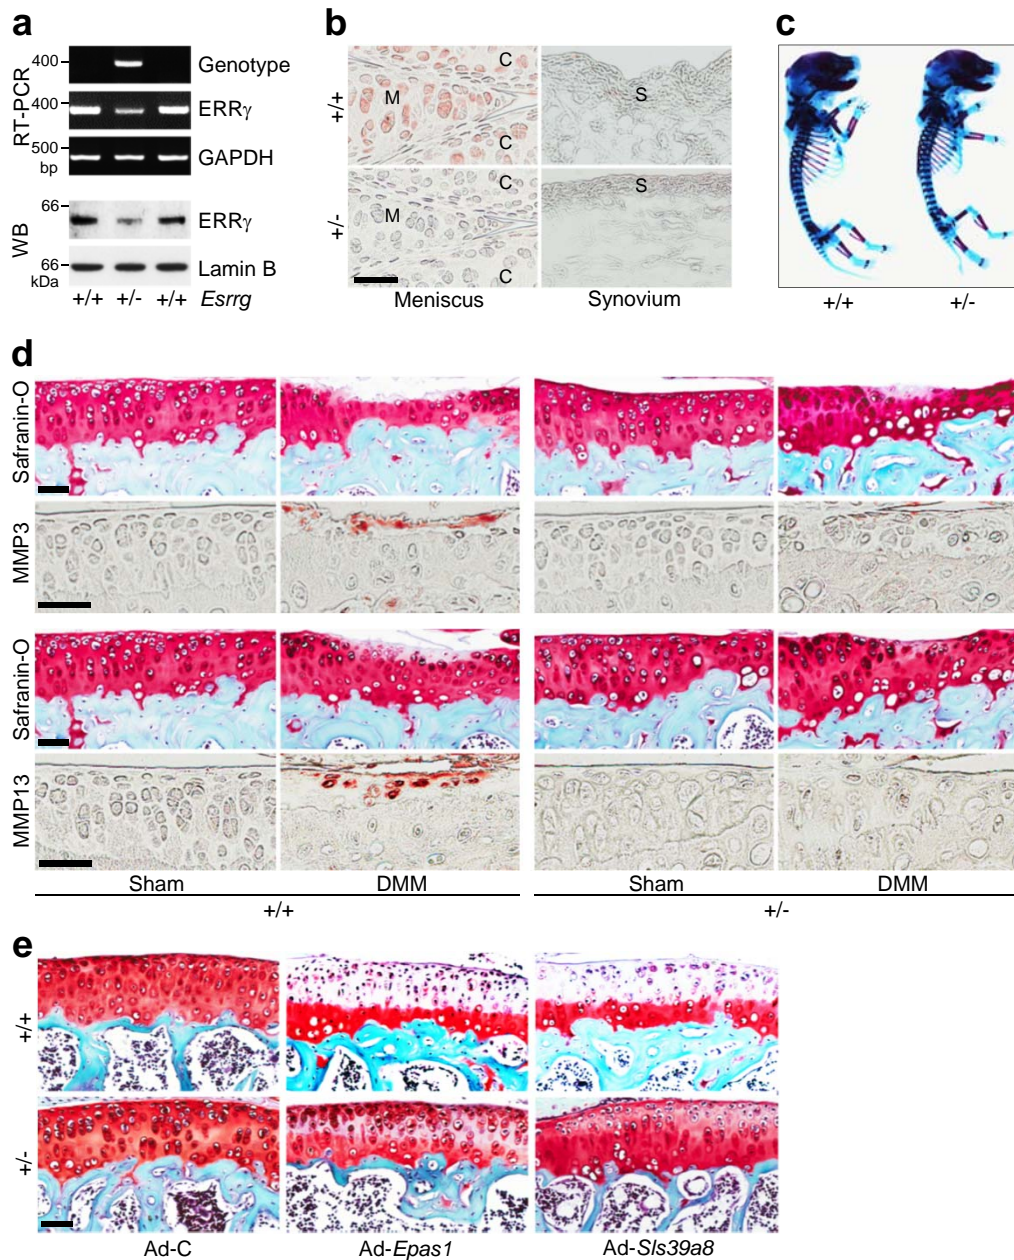

**Supplementary Figure 6.** Characterization of *Esrrg*<sup>+/-</sup> mice. **(a)** Genotypes of *Esrrg*<sup>+/-</sup> mice and WT (+/+) littermates. RT-PCR and Western blotting were used to examine mRNA and protein levels, respectively, of ERR $\gamma$  in primary cultured chondrocytes isolated from *Esrrg*<sup>+/-</sup> and WT littermates. GAPDH and lamin B were used as loading controls. **(b)** Immunostaining for ERR $\gamma$  proteins in joint tissues of *Esrrg*<sup>+/-</sup> and WT littermates. C, cartilage; M, meniscus; S, synovium. **(c)** Skeletal staining of E18.5 embryos of *Esrrg*<sup>+/-</sup> and WT mice. **(d)** *Esrrg*<sup>+/-</sup> and WT littermates were subject to sham operation or DMM surgery. Cartilage sections were stained with safranin-O and immunostained for MMP3 (upper) and MMP13 (lower). **(e)** *Esrrg*<sup>+/-</sup> and WT littermates were IA-injected with Ad-C, Ad-*Epas1*, or Ad-*Slc39a8*. Mice were sacrificed 3 weeks after the first injection, and cartilage sections were stained with safranin-O to detect cartilage destruction. Scale bar: 50  $\mu$ m.

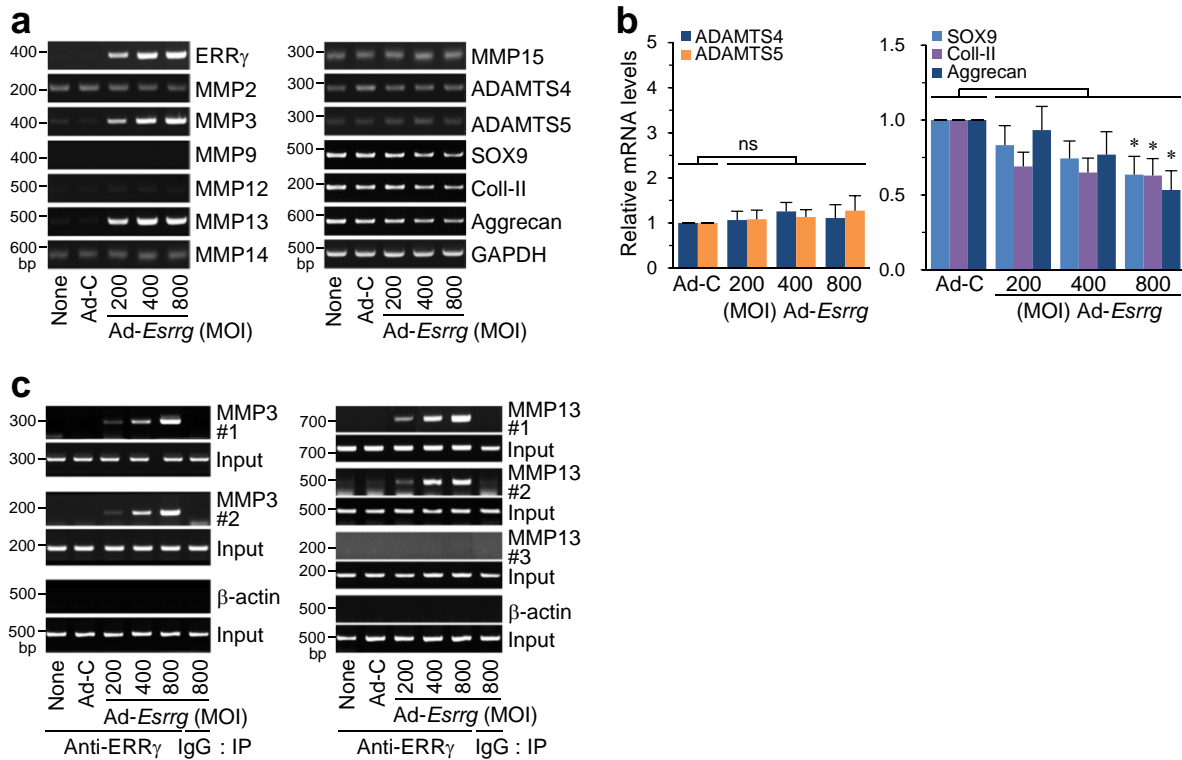

**Supplementary Figure 7.** ERR $\gamma$  regulation of catabolic and anabolic factors in chondrocytes. **(a)** mRNA levels of the indicated anabolic and catabolic factors were analyzed in primary cultured chondrocytes infected with Ad-C (800 MOI) or the indicated MOI of Ad-Esrrg for 36 hours. **(b)** mRNA levels of the indicated molecules were quantified in chondrocytes infected with Ad-C (800 MOI) or the indicated MOI of Ad-Esrrg ( $n = 12$ ). **(c)** Binding of ERR $\gamma$  to the indicated ERRE sequences was determined by ChIP assay of chondrocytes infected with 800 MOI of Ad-C or the indicated MOI of Ad-Esrrg.  $\beta$ -Actin was used as a negative control, and IgG was used as an isotype control for the anti-ERR $\gamma$  antibody ( $n \geq 4$ ). Values are presented as means  $\pm$  s.e.m. (\* $P < 0.05$ , \*\* $P < 0.005$ , and \*\*\* $P < 0.0005$ ; ns, not significant. One-way ANOVA).

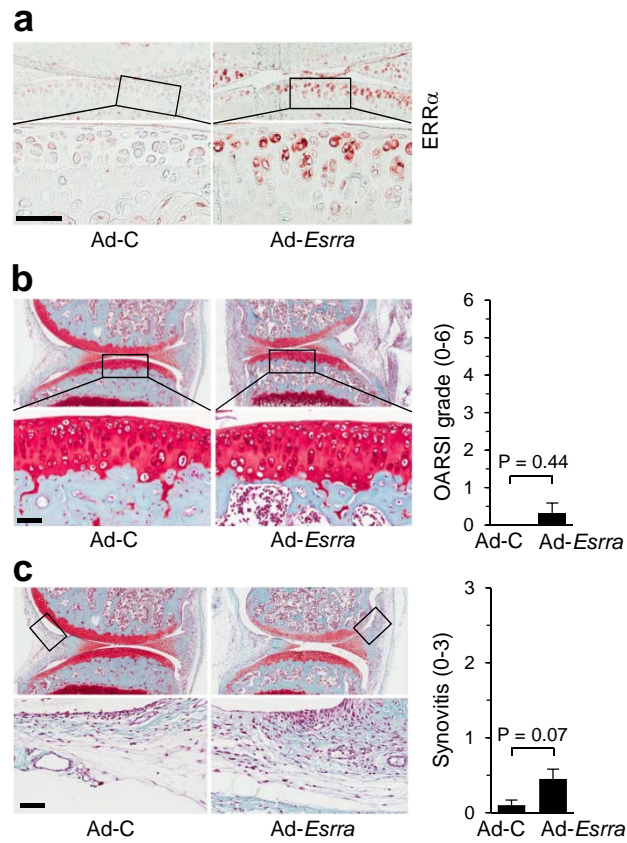

**Supplementary Figure 8.** Overexpression of ERR $\alpha$  does not cause cartilage damage or synovitis. **(a)** Immunostaining for ERR $\alpha$  in cartilage sections from mice IA-injected with Ad-C (control) or Ad-Esrria (to overexpress ERR $\alpha$ ) for 3 weeks. **(b,c)** Ad-C and Ad-Esrria were IA-injected into 10-week-old mice. Safranin-O staining and OARSIS grade **(b)**;  $n = 6$  mice per group) and H&E staining and synovial inflammation **(c)**;  $n = 6$  mice per group). Values are presented as means  $\pm$  s.e.m. Mann-Whitney U test for OARSIS grade and two-tailed t-test for synovitis. Scale bar: 50  $\mu$ m.



**a** Uncropped blots related to Fig. 2c

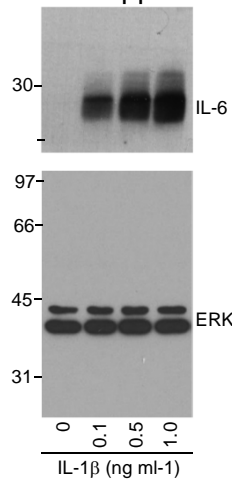

**b** Uncropped blots related to Fig. 2d

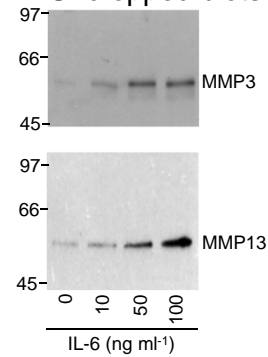

**c** Uncropped blots related to Fig. 4a

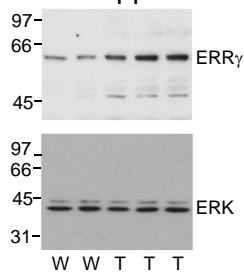

**d** Uncropped blots related to Fig. 7a

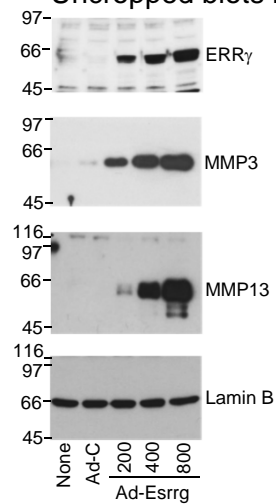

**e** Uncropped blots related to Fig. S6a

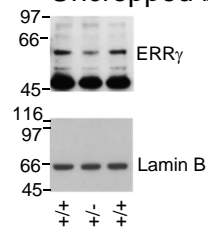

**Supplementary Figure 9.** Uncropped scans of the immunoblots. (a-e) Uncropped immunoblots related to Fig. 2c (a), 2d (b), 4a (c), 7a (d), and S6a (e).

**Supplementary Table 1.** Microarray analysis of the mRNA levels of ERR $\gamma$  upstream signaling components in chondrocytes treated with IL-1 $\beta$  (36 hours, 1 ng ml<sup>-1</sup>) or infected (36 hours) with 800 MOI of Ad-*Epas1* (to overexpress HIF-2 $\alpha$ ) or Ad-*Slc39a8* (to overexpress ZIP8).

| Upstream signal | Gene symbol   | Protein                                            | Microarray (fold change) |                    |                    |
|-----------------|---------------|----------------------------------------------------|--------------------------|--------------------|--------------------|
|                 |               |                                                    | IL-1 $\beta$             | HIF-2 $\alpha$     | ZIP8               |
| Alcohol         | <i>Cnr1</i>   | Cannabinoid receptor 1                             | -1.484 $\pm$ 0.120       | -1.259 $\pm$ 0.008 | -1.172 $\pm$ 0.109 |
|                 | <i>Mapk8</i>  | Mitogen-activated protein kinase 8                 | 1.366 $\pm$ 0.131        | 1.099 $\pm$ 0.046  | 1.009 $\pm$ 0.088  |
|                 | <i>Jun</i>    | Jun proto-oncogene                                 | 2.359 $\pm$ 0.079        | 1.492 $\pm$ 0.154  | 1.090 $\pm$ 0.106  |
| Inflammation    | <i>Il6</i>    | Interleukin 6                                      | 70.287 $\pm$ 0.291       | 5.321 $\pm$ 0.244  | 3.782 $\pm$ 0.305  |
|                 | <i>Il6ra</i>  | Interleukin 6 receptor, $\alpha$                   | -1.026 $\pm$ 0.105       | -1.167 $\pm$ 0.084 | -1.075 $\pm$ 0.091 |
|                 | <i>Jak1</i>   | Janus kinase 1                                     | 1.511 $\pm$ 0.023        | 1.482 $\pm$ 0.069  | 1.263 $\pm$ 0.044  |
|                 | <i>Jak2</i>   | Janus kinase 2                                     | -1.298 $\pm$ 0.105       | 1.078 $\pm$ 0.042  | 1.084 $\pm$ 0.044  |
|                 | <i>Jak3</i>   | Janus kinase 3                                     | -1.078 $\pm$ 0.086       | 1.196 $\pm$ 0.114  | 1.186 $\pm$ 0.097  |
|                 | <i>Stat3</i>  | Signal transducer and activator of transcription 3 | 1.230 $\pm$ 0.030        | 1.397 $\pm$ 0.055  | 1.231 $\pm$ 0.058  |
| Fasting         | <i>Gcgr</i>   | Glucagon receptor                                  | 1.027 $\pm$ 0.072        | -1.002 $\pm$ 0.092 | -1.071 $\pm$ 0.084 |
|                 | <i>Prkaca</i> | Protein kinase A, $\alpha$ subunit                 | 1.167 $\pm$ 0.063        | 1.233 $\pm$ 0.095  | 1.125 $\pm$ 0.089  |
|                 | <i>Creb1</i>  | cAMP responsive element binding protein 1          | -1.071 $\pm$ 0.079       | 1.067 $\pm$ 0.048  | -1.051 $\pm$ 0.044 |
|                 | <i>Creb2</i>  | cAMP responsive element binding protein 2          | -                        | -                  | -                  |
|                 | <i>Creb3</i>  | cAMP responsive element binding protein 3          | -1.208 $\pm$ 0.076       | -1.128 $\pm$ 0.050 | -1.194 $\pm$ 0.036 |
| Feeding         | <i>Insr</i>   | Insulin receptor                                   | 1.130 $\pm$ 0.104        | -1.374 $\pm$ 0.098 | -1.338 $\pm$ 0.042 |
|                 | <i>Akt</i>    | Thymoma viral proto-oncogene 1                     | -1.449 $\pm$ 0.048       | 1.019 $\pm$ 0.057  | 1.027 $\pm$ 0.049  |
|                 | <i>Sik2</i>   | Salt-inducible kinase 2                            | 1.299 $\pm$ 0.082        | 1.051 $\pm$ 0.099  | 1.029 $\pm$ 0.097  |
|                 | <i>Crtc2</i>  | CREB regulated transcription coactivator 2         | 1.036 $\pm$ 0.039        | 1.064 $\pm$ 0.119  | -1.007 $\pm$ 0.098 |
| Hypoxia         | <i>Hif1a</i>  | Hypoxia-inducible factor 1, $\alpha$ subunit       | 1.202 $\pm$ 0.072        | 1.440 $\pm$ 0.043  | 1.260 $\pm$ 0.038  |
|                 | <i>Epas1</i>  | Hypoxia-inducible factor 2, $\alpha$ subunit       | 10.033 $\pm$ 0.139       | 58.574 $\pm$ 0.056 | 3.683 $\pm$ 0.135  |
| ER stress       | <i>Atf6</i>   | Activating transcription factor 6                  | -1.187 $\pm$ 0.099       | -1.333 $\pm$ 0.056 | -1.222 $\pm$ 0.055 |
| ERRs            | <i>Esrra</i>  | ERR $\alpha$                                       | 1.03 $\pm$ 0.122         | 1.05 $\pm$ 0.043   | 0.99 $\pm$ 0.079   |
|                 | <i>Esrrb</i>  | ERR $\beta$                                        | 1.06 $\pm$ 0.077         | 0.85 $\pm$ 0.176   | 1.01 $\pm$ 0.189   |
|                 | <i>Esrrg</i>  | ERR $\gamma$                                       | 0.87 $\pm$ 0.067         | 0.87 $\pm$ 0.091   | 0.91 $\pm$ 0.114   |

**Supplementary Table 2.** PCR primers and conditions.

| Genes          | Strand | Primer sequences                | Size (bp) | AT (°C) | Origin |
|----------------|--------|---------------------------------|-----------|---------|--------|
| <i>Adamts4</i> | S      | 5'-CATCCGAAACCCTGTCAACTTG-3'    | 281       | 58      | Mouse  |
|                | AS     | 5'-GCCCATCATCTTCCACAATAGC-3'    |           |         |        |
| <i>Adamts5</i> | S      | 5'-GCCATTGTAATAACCCTGCACC-3'    | 292       | 58      | Mouse  |
|                | AS     | 5'-TCAGTCCCATCCGTAACCTTTG-3'    |           |         |        |
| <i>Acan</i>    | S      | 5'-CTGTCTTTGTCACCCACACATG-3'    | 581       | 55      | Mouse  |
|                | AS     | 5'-GAAGACGACATCACCATCCAG-3'     |           |         |        |
| <i>Col2a1</i>  | S      | 5'-CACACTGGTAAGTGGGGCAAGACCG-3' | 173       | 57      | Mouse  |
|                | AS     | 5'-GGATTGTGTTGTTTCAGGGTTCGGG-3' |           |         |        |
| <i>Epas1</i>   | S      | 5'-CGAGAAGAACGACGTGGTGTTC-3'    | 333       | 64      | Mouse  |
|                | AS     | 5'-GTGAAGGCTGGCAGGCTCC-3'       |           |         |        |
| <i>Esrra</i>   | S      | 5'-TGCCAATTCTGACTCTGTGC-3'      | 264       | 60      | Mouse  |
|                | AS     | 5'-ATCATGGCCTCAAGCATTC-3'       |           |         |        |
| <i>ESRRA</i>   | S      | 5'-TGCCAATTCAGACTCTGTGC-3'      | 257       | 60      | Human  |
|                | AS     | 5'-CCTCGAGCATCTCCAAGAAC-3'      |           |         |        |
| <i>Esrrb</i>   | S      | 5'-CTAGGGGTTGAGCAGGACAA-3'      | 200       | 60      | Mouse  |
|                | AS     | 5'-ATCTCCATCCAGGCACTCTG-3'      |           |         |        |
| <i>ESRRB</i>   | S      | 5'-TGTCAAGCCATGATGGAAAA-3'      | 182       | 60      | Human  |
|                | AS     | 5'-GGTGAGCCAGAGATGCTTTC-3'      |           |         |        |
| <i>Esrrg</i>   | S      | 5'-AAGATCGACACATTGATTCCAGC-3'   | 350       | 64      | Mouse  |
|                | AS     | 5'-GCTTCACATGATGCAACCCC-3'      |           |         |        |
| <i>ESRRG</i>   | S      | 5'-AAGATCGACACATTGATTCCAGC-3'   | 350       | 64      | Human  |
|                | AS     | 5'-GCTTCACATGATGCAACCCC-3'      |           |         |        |
| <i>Gapdh</i>   | S      | 5'-TCACTGCCACCCAGAAGAC-3'       | 450       | 58      | Mouse  |
|                | AS     | 5'-TGTAGGCCATGAGGTCCAC-3'       |           |         |        |
| <i>Mmp2</i>    | S      | 5'-CCAACTACGATGATGAC-3'         | 233       | 60      | Mouse  |
|                | AS     | 5'-ACCAGTGTCAAGTATCAG-3'        |           |         |        |
| <i>Mmp3</i>    | S      | 5'-AGGGATGATGATGCTGGTATGG-3'    | 434       | 58      | Mouse  |
|                | AS     | 5'-CCATGTTCTCCAAGTCAAAGG-3'     |           |         |        |
| <i>Mmp9</i>    | S      | 5'-TGCACTGGGCTTAGATCATTCC-3'    | 450       | 58      | Mouse  |
|                | AS     | 5'-CGGTCCTTGAAGAAATGCAGAG-3'    |           |         |        |
| <i>Mmp12</i>   | S      | 5'-CCCAGAGGTCAAGATGGATG-3'      | 482       | 60      | Mouse  |
|                | AS     | 5'-GGCTCCATAGAGGGACTGAA-3'      |           |         |        |
| <i>Mmp13</i>   | S      | 5'-TGATGGACCTTCTGGTCTTCTGG-3'   | 473       | 58      | Mouse  |
|                | AS     | 5'-CATCCACATGGTTGGGAAGTTCT-3'   |           |         |        |
| <i>Mmp14</i>   | S      | 5'-GTGCCCTAGGCCTACATCCG-3'      | 580       | 55      | Mouse  |
|                | AS     | 5'-TTGGGTATCCATCCATCACT-3'      |           |         |        |
| <i>Mmp15</i>   | S      | 5'-GAGAGATGTTTGTGTTCAAGGG-3'    | 260       | 62      | Mouse  |
|                | AS     | 5'-TGTGTCAATGCGGTCATAGGG-3'     |           |         |        |
| <i>Sox9</i>    | S      | 5'-CACTGGCAGTTACGGCATCAG-3'     | 457       | 61      | Mouse  |
|                | AS     | 5'-CATGTAAGTGAAGGTGGAGTAGAGC-3' |           |         |        |
| <i>Slc36a8</i> | S      | 5'-GAACAATTGCCTGGATGATCACGC-3'  | 430       | 58      | Mouse  |
|                | AS     | 5'-AAGCCGGTTAACATCCCTGCATTC-3'  |           |         |        |

AT, annealing temperature; S, sense; AS, antisense

**Supplementary Table 3.** PCR primers and conditions for ChIP assays.

| Target                     | Strand  | Primer sequences                                          | Size (bp) | AT (°C) | Origin |
|----------------------------|---------|-----------------------------------------------------------|-----------|---------|--------|
| <i>Mmp3</i><br>#1(F)       | S<br>AS | 5'-CACCTCCCCCTGTCATTTAG-3'<br>5'-GGGATCAAACCTCAAGCCATC-3' | 300       | 59      | Mouse  |
| <i>Mmp3</i><br>#2(F)       | S<br>AS | 5'-AGCCACTACCAGATCCTTGC-3'<br>5'-GAGGGAGCAAAGGGAAAAAC-3'  | 198       | 60      | Mouse  |
| <i>Mmp13</i><br>#1(F1)(F2) | S<br>AS | 5'-TTGACCATGGGGCTAGAAAG-3'<br>5'-GCCTCAGCATTTTCATGGAT-3'  | 769       | 60      | Mouse  |
| <i>Mmp13</i><br>#2(R1)(R2) | S<br>AS | 5'-TGCCACATCACCTCCAATAA-3'<br>5'-CTTTCTAGCCCCATGGTCAA-3'  | 500       | 60      | Mouse  |
| <i>Mmp13</i><br>#3(F)      | S<br>AS | 5'-GTGGCACAATGGTTTGAGTG-3'<br>5'-CCATCACTCCCAGTCAGGTT-3'  | 181       | 60      | Mouse  |
| <i>Mmp13</i><br>#4(R)      | S<br>AS | 5'-CATAAGGCCAACCTCAGCTC-3'<br>5'-TGGCGTTTGAAACTGTTCTG-3'  | 568       | 60      | Mouse  |

AT, annealing temperature; S, sense; AS, antisense
